# Supplementary material
Source: publisher figshare collection journal article supplement (https://sage.figshare.com/ndownloader/files/17797634)
Supplement: Supplementary file 1 [file 17797634]

## Sheet: Supplemental Table 1
Supplemental Table 1. PoAstV3 RT-qPCR results in non-CNS tissues from cases 1-13.
Case	Heart	Liver	Kidney	Spleen	Lung	LN	Thymus	Tonsil	Ileum	Jejunum	Colon	SM	SN
1	-	-	-	-	-	NA	NA	NA	NA	NA	NA	NA	NA
2	-	-	-	-	-	NA	NA	NA	NA	NA	NA	-	NA
3	NA	NA	NA	-	-	NA	NA	NA	-	NA	-	NA	NA
4	NA	-	-	-	-	-	NA	NA	-	-	-	NA	NA
5	-	-	-	-	-	-	-	-	-	NA	NA	NA	NA
6	NA	NA	NA	NA	NA	NA	NA	NA	NA	NA	NA	NA	NA
7	-	-	-	-	-	-	NA	NA	-	-	NA	NA	-
8	NA	NA	NA	NA	NA	NA	NA	NA	NA	NA	NA	NA	NA
9	-	-	-	-	-	NA	NA	NA	NA	NA	NA	NA	NA
10	NA	NA	NA	NA	NA	NA	NA	NA	NA	NA	NA	NA	NA
11	-	-	-	-	-	NA	NA	NA	-	NA	NA	NA	NA
12	NA	-	NA	-	-	-	NA	NA	-	-	-	NA	NA
13	-	-	-	-	-	-	NA	-	NA	NA	NA	NA	NA
Abbreviations: LN, lymph node; SM, Skeletal muscle; SN, Spinal nerve; NA, Not available; (-), Negative.

## Sheet: Supplemental Table 2
Supplemental Table 2. Additional testing and histologic distribution of lesions at time of diagnosis.
Case	Category (age)	CNS histologic lesions					Other histologic lesions	PRRSV PCR (sample)	PCV2 PCR (sample)	IAV PCR (sample)	Reported neurologic clinical signs
		C	CB	BS	SC	LM
1	Sow	Yes	NA	NA	Yes	No	None	ND	ND	ND	Lateral recumbancy with no nystagmus or opisthotonos
2	Sow (3-yo)	Yes	Yes	NA	Yes	No	None	Negative (serum)	ND	ND	Nystagmus and lethargy
3	Finisher (15-wo)	NA	NA	Yes	NA	No	None	Negative (brain)	ND	Negative (lung)	Lateral recumbancy
4	Finisher	Yes	Yes	Yes	NA	Yes	None	ND	ND	ND	Lateral recumbancy and head tilt
5	Nursery (5-wo)	Yes	NA	Yes	NA	No	None	Negative (lung)	ND	ND	Specific CNS signs not reported
6	Finisher	Yes	NA	Yes	Yes	Yes	None	ND	ND	Negative (lung)	Lateral recumbancy and paresis
7	Adult sow	Yes	No	Yes	Yes	Yes	Bronchopneumonia, purulent	ND	ND	ND	Paresis
8	Adult sow	NA	NA	Yes	Yes	No	None	Negative (brain)	ND	ND	Paresis and head tilt
9	Nursery (5-wo)	NA	NA	NA	Yes	No	Interstitial pneumonia, lymphohistiocytic	Positive (lung)	ND	ND	Paresis, ataxia and head tilt
10	Adult sows	Yes	Yes	NA	NA	Yes	none	Negative (lung)	ND	Negative (lung)	Specific CNS signs not reported
11	Finisher (12 to 24-wo)	No	No	Yes	NA	Yes	Interstitial pneumonia, lymphohistiocytic	Positive (lung)	ND	Negative (lung)	Lateral recumbancy with no paddling
12	Nursery (6-wo)	NA	Yes	Yes	Yes	No	None	ND	ND	ND	Lateral recumbancy
13	Adult (1-yo)	Yes	Yes	Yes	Yes	Yes	None	ND	ND	ND	Paresis with retained central awareness and no nystagmus
14	Nursery (3 to 4-wo)	Yes	No	Yes	Yes	No	None	ND	ND	ND	Lateral recumbancy and paresis
15	Nursery (4 to 8-wo)	NA	No	Yes	Yes	No	None	ND	ND	ND	Lateral recumbancy and paresis
16	Nursery (4 to 8-wo)	NA	NA	Yes	Yes	No	None	ND	ND	ND	Lateral recumbancy and paresis
Abbreviations: C= cerebrum; CB= Cerebellum; BS= Brainstem; SC= Spinal cord; LM= Leptomeninges;NA= not available; ND= Not done; PCR= Polymerase chain reaction; PRRSV= Porcine reproductive and respiratory syndrome virus; PCV2= Porcine circovirus type 2; IAV= Influenza A virus; wo= Weeks-old; yo= Years-old.

## Sheet: Supplemental Table 3 
Supplemental Table 3. PoAstV3, PTV and PSV RT-qPCR results from case Nos 14-16.
Case 14	Animal A ͣ			Animal B ͣ			Animal C ͣ			Animal D ͣ
	PoAstV-3	PTV	PSV	PoAstV-3	PTV	PSV	PoAstV-3	PTV	PSV	PoAstV-3	PTV	PSV
Cerebrum	22.1	-	-	-	-	-	31.8	-	-	24.5	-	-
Cerebellum	24.9	-	-	25.8	-	-	32.4	-	-	22.9	-	-
Brainstem	31.1	-	-	31.3	-	-	-	-	-	26.3	-	-
Cervical SC	26.9	-	-	27.7	-	-	38.8	-	-	23.2	-	-
Thoracic SC	26.3	-	-	28.6	-	-	38.7	-	-	25.8	-	-
Lumbar SC	23.6	-	-	28.1	-	-	-	-	-	21.5	-	-
Heart	-	-	-	-	-	-	-	-	-	-	-	-
Lung	-	-	-	-	-	-	-	-	-	-	-	-
Tonsil	-	-	33.7	-	27.7	37.6	-	32.5	33.3	-	31.5	-
Spleen	-	-	-	-	-	-	-	-	-	-	-	-
Thymus	-	-	-	-	-	-	-	-	-	-	-	-
Stomach	-	29.3	28.2	-	31.2	31.8	-	32	-	-	32.3	30.7
Jejunum	-	28	32.2	-	24.6	-	-	26.7	-	-	33.8	-
Ileum	-	24.9	28	-	22.5	31.1	-	27.6	-	-	23.6	-
Colon	-	22.8	21.5	-	24.4	22.9	-	21.4	24.8	-	22	21.7
Adrenal Gl.	-	-	-	-	-	35.3	-	-	-	-	-	-
Liver	-	-	-	-	-	-	-	-	-	-	-	-
Kidney	-	-	-	-	-	-	-	-	-	-	-	-
TBLN	-	-	-	-	-	-	-	-	36.7	-	-	36
MLN	-	27	-	-	29.8	-	-	29	31.1	-	28.9	-
ILN	-	-	-	-	-	-	-	-	-	-	-	34.6
Case 15	Animal A			Animal B			Animal C ͣ			Animal D ͣ
	PoAstV-3	PTV	PSV	PoAstV-3	PTV	PSV	PoAstV-3	PTV	PSV	PoAstV-3	PTV	PSV
Cerebrum	-	-	-	-	-	-	22.5	-	-	21.2	-	-
Cerebellum	-	-	-	-	-	-	24	-	-	18.3	-	-
Brainstem	-	-	-	-	-	-	22.1	-	-	25.8	-	-
Cervical SC	-	-	-	-	-	-	24.1	-	-	23.1	-	-
Thoracic SC	-	-	-	-	-	-	25.1	-	-	25.2	-	-
Lumbar SC	-	-	-	-	-	-	24	-	-	23.6	-	-
Heart	-	-	-	-	-	-	-	-	-	-	-	-
Lung	-	-	-	-	-	-	-	-	-	-	-	-
Tonsil	-	-	-	-	28.5	-	-	-	-	-	-	-
Spleen	-	-	-	-	-	-	-	-	-	-	35.1	-
Thymus	-	-	-	-	-	-	-	-	-	-	-	-
Stomach	-	-	-	-	-	-	-	-	-	-	-	-
Jejunum	-	27.3	-	-	29.7	-	-	-	-	-	-	-
Ileum	-	23.9	-	-	23.4	-	-	28.9	-	-	19.8	-
Colon	-	27	-	-	26.7	-	-	32.6	31.1	-	21.1	-
Adrenal Gl.	-	-	-	-	-	-	-	-	-	-	-	-
Liver	-	-	-	-	-	-	-	-	-	-	-	-
Kidney	-	33.4	-	-	-	-	-	-	-	-	-	-
TBLN	-	-	-	-	-	-	-	-	-	-	-	-
MLN	-	30	-	-	32.7	-	-	29.7	-	-	28.6	-
ILN	-	-	-	-	-	-	-	-	36.9	-	-	-
Case 16	Animal A			Animal B ͣ			Animal C ͣ
	PoAstV-3	PTV	PSV	PoAstV-3	PTV	PSV	PoAstV-3	PTV	PSV
Cerebrum	-	-	-	25.5	-	-	27	-	-
Cerebellum	-	-	-	31.1	-	-	30.2	-	-
Brainstem	37.6	-	-	28.3	-	-	31.1	-	-
Pooled SC	-	-	-	22.2	-	-	19.3	-	-
Heart	-	-	-	-	-	-	-	-	-
Lung	-	-	-	-	-	-	-	-	-
Tonsil	-	-	-	-	32.8	-	-	-	35.2
Spleen	-	-	-	-	-	-	-	-	-
Thymus	NA	NA	NA	NA	NA	NA	NA	NA	NA
Stomach	NA	NA	NA	NA	NA	NA	NA	NA	NA
Jejunum	23.8	28.7	-	NA	NA	NA	NA	NA	NA
Ileum	25.7	33.2	-	-	28.2	-	-	-	-
Colon	28.5	-	-	-	23.8	28.1	33	33.3	24.9
Adrenal Gl.	NA	NA	NA	NA	NA	NA	NA	NA	NA
Liver	-	-	-	-	-	-	-	-	-
Kidney	-	-	-	-	-	-	-	-	-
TBLN	-	-	-	-	-	-	-	-	-
MLN	34.7	33.3	-	-	30.5	-	-	-	35.2
ILN	NA	NA	NA	NA	NA	NA	NA	NA	NA
Abbreviations: PTV, Teschovirus A; PSV, Sapelovirus A; SC, spinal cord; Gl, gland; TBLN, tracheobronchial lymph node; MLN, mesenteric lymph node; ILN, inguinal lymph node;(-), not detected; NA, not available; ͣ , Denotes the presence of histologic lesions in that animal.

## Sheet: Supplemental Table 4
Supplemental Table 4. Homology matrix of sequences obtained from case 16.
	MH686398 (Colon, A)	MH686398 (CNS, B)	MH686397 (CNS, C)
MH686398 (Colon, A)		100	99.9
MH686398 (CNS, B)	0		99.9
MH686397 (CNS, C)	0.1	0.1
Abbreviations: CNS, Central nervous system; Genbank accession with corresponding tissue and animal ID between parentheses. Columns represent percentage identity and rows percentage of divergence.

## Sheet: Supplemental Table 5 
Supplemental Table 5. Homology matrix for phylogenetic tree 1.
	PoAstV1_(MAstV3) AB037272.1	PoAstV4_1512 KU764486	PoAstV2USIA122 JX556690	PoAstV5_USIA122_NC 023636.1	PoAstV3/JPN/Bu79/2014 LC201598.1	PoAstV3_Faeces/TM12052013/HUN KY073233.1	PoAstV3_NIBrain/1732016a/HUN KY073231	PoAstV3_NIBrain/3862015/HUN KY073232	PoAstV3_NIBrain/92016a/HUN KY073229	PoAstV3_NISC/92016a/HUN KY073230	PoAstV3_USA/IA/7023/2017 KY940545	PoAstV3_USA/IA/39697/2016 MH686393	PoAstV3_USA/IA/67348/2015 MH686390	PoAstV3_USMO123 NC019494.1	PoAstV3_USA/IA/02613C/2018 MH686395	PoAstV3_USA/IA/06535C/2018 MH686399	PoAstV3_USA/IA/02613A/2018 MH686394	PoAstV3_USA/IA/02613D/2018 MH686396	PoAstV3_USA/IA/06535D/2018 MH686400	PoAstV3_USA/IA/81706B/2017 MH686398	PoAstV3_USA/IA/81706C/2017 MH686397	PoAstV3_USA/IA/48545C/2015 MH686392	PoAstV3_USA/IA/48545D/2015 MH686391	PoAstV3/JPN/Bu84/2014 LC201599.1	PoAstV3/JPN/Bu25/2014 LC201595.1	PoAstV3/JPN/Bu421/2014 LC201596.1	PoAstV3/JPN/Bu44/2014 LC201597.1
PoAstV1_(MAstV3) AB037272.1		31.98	32.99	33.32	38.67	41.62	41.04	41.07	41.07	41.11	41.39	45.32	45.32	41.71	47.9	48.45	47.8	48.09	48.52	48.45	47.87	45.56	45.61	41.77	41.14	41.39	41.51
PoAstV4_1512_KU764486	31.98		38.35	33.33	39.89	41.46	41.24	41.09	41.09	41.95	41.04	44.18	44.18	40.99	46.49	46.39	46.28	46.68	46.46	46.52	45.78	43.55	43.31	41.28	41.4	41.54	41.59
PoAstV2USIA122_JX556690	32.99	38.35		34.61	42.18	42.45	43.14	43.21	43.15	42.5	43.82	45.12	45.12	44.03	47.33	47.78	46.72	47.39	47.78	47.91	47.6	46.32	46.2	44.14	43.36	43.35	43.33
PoAstV5_USIA122_NC_023636.1	33.32	33.33	34.61		42.11	43.09	43.12	43.06	43.13	42.92	43.57	46.61	46.61	43.4	47.7	48.15	47.6	47.89	48.22	48.15	48.12	46.95	46.78	43.34	43.34	43.6	43.61
PoAstV3/JPN/Bu79/2014_LC201598.1	38.67	39.89	42.18	42.11		69.04	77.77	77.63	77.72	68.74	78.5	66.09	66.09	78.94	69.15	68.99	68.9	69.11	69.13	69.13	68.52	66.53	66.79	79.77	80.12	79.51	79.48
PoAstV3_Faeces/TM12052013/HUN_KY073233.1	41.62	41.46	42.45	43.09	69.04		91.58	91.61	91.52	91.68	85.51	85.23	85.23	86.23	85.79	85.95	85.58	86.04	86.02	85.81	85.81	84.34	84.38	86.16	85.21	85.58	85.66
PoAstV3_NIBrain/1732016a/HUN_KY073231	41.04	41.24	43.14	43.12	77.77	91.58		99.48	99.39	99.38	86.13	84.49	84.49	86.08	84.58	84.57	84.39	84.83	84.64	84.44	84.41	83.97	83.89	86.19	85.53	86.24	86.28
PoAstV3_NIBrain/3862015/HUN_KY073232	41.07	41.09	43.21	43.06	77.63	91.61	99.48		99.56	99.64	85.94	83.99	83.99	85.95	84.05	84.02	83.86	84.3	84.09	83.88	83.85	83.48	83.4	85.92	85.42	86.05	86.09
PoAstV3_NIBrain/92016a/HUN_KY073229	41.07	41.09	43.15	43.13	77.72	91.52	99.39	99.56		99.77	85.88	83.37	83.37	85.92	83.38	83.33	83.2	83.62	83.4	83.2	83.15	82.86	82.78	85.91	85.34	86.08	86.12
PoAstV3_NISC/92016a/HUN_KY073230	41.11	41.95	42.5	42.92	68.74	91.68	99.38	99.64	99.77		85.32	83.99	83.99	85.57	84.05	84.02	83.86	84.3	84.09	83.88	83.85	83.48	83.4	86.79	85.42	86.25	86.33
PoAstV3_USA/IA/7023/2017_KY940545	41.39	41.04	43.82	43.57	78.5	85.51	86.13	85.94	85.88	85.32		99.13	99.13	92.28	93.03	93.25	92.86	93.29	93.32	93.11	93.12	92.85	92.9	87.38	87.33	87.27	87.32
PoAstV3_USA/IA/39697/2016_MH686393	45.32	44.18	45.12	46.61	66.09	85.23	84.49	83.99	83.37	83.99	99.13		99.75	93.94	92.8	92.94	92.8	92.93	93.01	92.8	92.94	93.14	93.14	88.42	86.82	88.42	88.42
PoAstV3_USA/IA/67348/2015_MH686390	45.32	44.18	45.12	46.61	66.09	85.23	84.49	83.99	83.37	83.99	99.13	99.75		93.94	92.8	92.94	92.8	92.93	93.01	92.8	92.94	93.14	93.14	88.42	86.82	88.42	88.42
PoAstV3_USMO123_NC_019494.1	41.71	40.99	44.03	43.4	78.94	86.23	86.08	85.95	85.92	85.57	92.28	93.94	93.94		93.03	93.11	92.86	93.29	93.18	92.98	92.98	94.08	94.26	88.32	88.45	87.85	87.9
PoAstV3_USA/IA/02613C/2018_MH686395	47.9	46.49	47.33	47.7	69.15	85.79	84.58	84.05	83.38	84.05	93.03	92.8	92.8	93.03		100	99.6	99.6	99.79	99.59	99.72	98.9	98.89	89.14	87.8	87.94	87.94
PoAstV3_USA/IA/06535C/2018_MH686399	48.45	46.39	47.78	48.15	68.99	85.95	84.57	84.02	83.33	84.02	93.25	92.94	92.94	93.11	100		99.72	99.72	99.79	99.59	99.72	99.01	99.01	89.53	88.29	88.02	88.02
PoAstV3_USA/IA/02613A/2018_MH686394	47.8	46.28	46.72	47.6	68.9	85.58	84.39	83.86	83.2	83.86	92.86	92.8	92.8	92.86	99.6	99.72		99.73	99.79	99.59	99.72	98.9	98.89	88.89	87.57	87.7	87.7
PoAstV3_USA/IA/02613D/2018_MH686396	48.09	46.68	47.39	47.89	69.11	86.04	84.83	84.3	83.62	84.3	93.29	92.93	92.93	93.29	99.6	99.72	99.73		99.93	99.59	99.72	99.03	99.03	89.4	88.05	88.19	88.19
PoAstV3_USA/IA/06535D/2018_MH686400	48.52	46.46	47.78	48.22	69.13	86.02	84.64	84.09	83.4	84.09	93.32	93.01	93.01	93.18	99.79	99.79	99.79	99.93		99.66	99.79	99.08	99.08	89.6	88.36	88.09	88.09
PoAstV3_USA/IA/81706B/2017_MH686398	48.45	46.52	47.91	48.15	69.13	85.81	84.44	83.88	83.2	83.88	93.11	92.8	92.8	92.98	99.59	99.59	99.59	99.59	99.66		99.86	99.15	98.87	89.39	88.15	88.15	88.15
PoAstV3_USA/IA/81706C/2017_MH686397	47.87	45.78	47.6	48.12	68.52	85.81	84.41	83.85	83.15	83.85	93.12	92.94	92.94	92.98	99.72	99.72	99.72	99.72	99.79	99.86		99.3	99.01	89.33	88.2	87.92	87.92
PoAstV3_USA/IA/48545C/2015_MH686392	45.56	43.55	46.32	46.95	66.53	84.34	83.97	83.48	82.86	83.48	92.85	93.14	93.14	94.08	98.9	99.01	98.9	99.03	99.08	99.15	99.3		99.51	88.33	87.84	87.59	87.59
PoAstV3_USA/IA/48545D/2015_MH686391	45.61	43.31	46.2	46.78	66.79	84.38	83.89	83.4	82.78	83.4	92.9	93.14	93.14	94.26	98.89	99.01	98.89	99.03	99.08	98.87	99.01	99.51		88.25	87.88	87.52	87.52
PoAstV3/JPN/Bu84/2014_LC201599.1	41.77	41.28	44.14	43.34	79.77	86.16	86.19	85.92	85.91	86.79	87.38	88.42	88.42	88.32	89.14	89.53	88.89	89.4	89.6	89.39	89.33	88.33	88.25		90.36	89.85	89.84
PoAstV3/JPN/Bu25/2014_LC201595.1	41.14	41.4	43.36	43.34	80.12	85.21	85.53	85.42	85.34	85.42	87.33	86.82	86.82	88.45	87.8	88.29	87.57	88.05	88.36	88.15	88.2	87.84	87.88	90.36		90.7	90.72
PoAstV3/JPN/Bu421/2014_LC201596.1	41.39	41.54	43.35	43.6	79.51	85.58	86.24	86.05	86.08	86.25	87.27	88.42	88.42	87.85	87.94	88.02	87.7	88.19	88.09	88.15	87.92	87.59	87.52	89.85	90.7		99.97
PoAstV3/JPN/Bu44/2014_LC201597.1	41.51	41.59	43.33	43.61	79.48	85.66	86.28	86.09	86.12	86.33	87.32	88.42	88.42	87.9	87.94	88.02	87.7	88.19	88.09	88.15	87.92	87.59	87.52	89.84	90.72	99.97
Abbreviations: PoAstV, porcine astrovirus; MAstV, Mamastrovirus.Strains are identified with strain name and GenBank accesion (bold). Strains identified in this study are italicized.

## Sheet: Supplemental Table 6
Supplemental Table 6. Homology matrix for phylogenetic tree 2.
	HAstV_MLB1_NAGANO1545 LC064152	HAstV_MLB2/human/Geneva/2014 KT224358	HAstV4_PT31391 HQ396890	HAstV4_PT110477 HQ396880	PoAstV3_NIBrain/1732016a/HUN KY073231	PoAstV3_NIBrain/3862015/HUN KY073232	PoAstV3_NIBrain/92016a/HUN KY073229	PoAstV3_NISC/92016a/HUN KY073230	BoAstV_NeuroS1 KF233994	BoAstV_CH13 NC024498	BoAstV_CH13/NeuroS1_43661 KX266907	BoAstV_CH13/NeuroS1_43660 KX266908	BoAstV_CH13/NeuroS1_23985 KX266905	BoAstV_CH13/NeuroS1_26875 KX266903	BoAstV_CH13/NeuroS1_36716 KX266904	BoAstV_CH13/NeuroS1_23871 KX266901	BoAstV_CH13/NeuroS1_42799 KX266906	BoAstV_CH13/NeuroS1_26730 KX266902	Mamastrovirus_13_(OvAstV)_UK/2014/lamb LT706530	Mamastrovirus_13_(OvAstV)_UK/2013/ewe LT706531	BoAstV_BH89/14 LN879482	Mamastrovirus_13_(OvAstV)_strain_CH16 KY859988	BoAstV_CH15 KT956903	HAstV_SG GQ891990	HAstV_PA_Paris KM401565	HAstvV_UK1 KM358468	HAstV_VA1/HMOC_London2 KJ920197	HAstV_VA1/HMOC_London1 KJ920196	MiAstV_SMSAstV GU985458	PoAstV3_USA/IA/02613C/2018 MH686395	PoAstV3_USA/IA/06535C/2018 MH686399	PoAstV3_USA/IA/02613A/2018 MH686394	PoAstV3_USA/IA/02613D/2018 MH686396	PoAstV3_USA/IA/06535D/2018 MH686400	PoAstV3_USA/IA/81706B/2017 MH686398	PoAstV3_USA/IA/81706C/2017 MH686397	PoAstV3_USA/IA/48545C/2015 MH686392	PoAstV3_USA/IA/48545D/2015 MH686391	PoAstV3_USA/IA/7023/2017 KY940545	PoAstV3_USA/IA/39697/2016 MH686393	PoAstV3_USA/IA/67348/2015 MH686390
HAstV_MLB1_NAGANO1545_LC064152		70.66	11.37	11.37	39.93	39.84	39.93	33.39	42.33	42.55	42.61	42.61	42.52	42.54	42.51	42.49	42.32	42.3	41.4	41.41	41.32	41.4	41.39	37.02	41.89	41.79	41.58	41.65	37.64	47.58	48.05	35.23	47.64	48.05	47.91	48.01	21.97	21.92	39.64	22.16	22.16
HAstV_MLB2/human/Geneva/2014_KT224358	70.66		11.17	11.17	39.42	39.46	39.46	32.38	41.38	41.5	41.6	41.59	41.59	41.53	41.54	41.54	41.44	41.45	41.12	41.15	40.76	40.93	40.91	34.97	41.25	40.93	41.1	41.05	36.94	46.54	46.98	34.69	46.6	46.98	46.85	46.79	21.86	21.7	39.29	21.6	21.6
HAstV4_PT31391_HQ396890	11.37	11.17		99.85	11.27	11.3	11.3	21.58	11.7	11.6	11.67	11.73	11.57	11.63	11.7	11.63	11.76	11.79	11.64	11.64	11.51	11.26	11.29	40.08	11.11	11.12	11.39	11.39	10.71	50.95	51.66	50.95	51.11	51.66	51.66	51.66	32.31	32.31	11	32.74	32.74
HAstV4_PT110477_HQ396880	11.37	11.17	99.85		11.27	11.3	11.3	21.58	11.7	11.6	11.67	11.73	11.57	11.63	11.7	11.63	11.76	11.79	11.64	11.64	11.51	11.26	11.29	40.08	11.11	11.12	11.39	11.39	10.71	50.95	51.66	50.95	51.11	51.66	51.66	51.66	32.31	32.31	11	32.74	32.74
PoAstV3_NIBrain/1732016a/HUN_KY073231	39.93	39.42	11.27	11.27		99.41	99.36	86.71	51.14	51.57	51.6	51.68	51.57	51.57	51.45	51.5	51.47	51.41	50.18	50.19	50.45	50.43	50.46	43.94	49.46	49.86	50.09	50.09	47.87	84.58	84.57	65.51	84.83	84.64	84.44	84.41	36.93	36.87	85.22	36.83	36.83
PoAstV3_NIBrain/3862015/HUN_KY073232	39.84	39.46	11.3	11.3	99.41		99.52	86.88	51.2	51.63	51.66	51.73	51.61	51.63	51.51	51.54	51.48	51.42	50.19	50.2	50.49	50.48	50.52	43.9	49.43	49.85	50.05	50.05	47.91	84.05	84.02	65.1	84.3	84.09	83.88	83.85	36.71	36.65	85.08	36.61	36.61
PoAstV3_NIBrain/92016a/HUN_KY073229	39.93	39.46	11.3	11.3	99.36	99.52		87.08	51.16	51.62	51.63	51.71	51.56	51.6	51.48	51.51	51.47	51.44	50.07	50.09	50.4	50.37	50.4	43.9	49.43	49.8	50	49.97	47.94	83.38	83.33	64.59	83.62	83.4	83.2	83.15	36.44	36.38	85.02	36.34	36.34
PoAstV3_NISC/92016a/HUN_KY073230	33.39	32.38	21.58	21.58	86.71	86.88	87.08		44.43	45.16	45.19	45.19	45.05	45.02	44.97	45	45	44.92	43.64	43.7	44.07	44.3	44.35	43.98	42.05	42.38	42.53	42.48	41.28	84.05	84.02	65.1	84.3	84.09	83.88	83.85	40.94	40.87	73.59	40.82	40.82
BoAstV_NeuroS1_KF233994	42.33	41.38	11.7	11.7	51.14	51.2	51.16	44.43		91.62	91.73	91.82	91.76	91.65	91.79	91.82	90.9	91.19	61.3	61.27	61.22	61.16	61.21	47.76	51.38	51.84	51.97	52.04	49.19	64.29	64.27	49.55	64.24	64.4	64.54	64.13	28.05	28.07	50.45	27.52	27.52
BoAstV_CH13_NC024498	42.55	41.5	11.6	11.6	51.57	51.63	51.62	45.16	91.62		98.28	98.35	98.18	98.28	98.45	98.53	93.57	94.06	61.04	61.07	61.29	61.11	61.06	48.45	51.82	52.28	52.28	52.4	49.46	64.55	64.67	49.95	64.77	64.81	64.67	64.54	28.38	28.45	51.07	27.82	27.82
BoAstV_CH13/NeuroS1_43661_KX266907	42.61	41.6	11.67	11.67	51.6	51.66	51.63	45.19	91.73	98.28		98.59	98.45	98.59	98.82	98.93	93.68	94.1	61.16	61.19	61.27	61.19	61.13	48.33	52	52.61	52.57	52.66	49.39	64.15	64.27	49.55	64.37	64.4	64.27	64.13	28.05	28.12	51.07	27.39	27.39
BoAstV_CH13/NeuroS1_43660_KX266908	42.61	41.59	11.73	11.73	51.68	51.73	51.71	45.19	91.82	98.35	98.59		98.51	98.62	98.85	98.93	93.78	94.26	61.27	61.29	61.35	61.22	61.13	48.41	51.94	52.53	52.5	52.62	49.52	65.08	65.22	50.35	65.3	65.35	65.22	65.1	28.43	28.5	51.22	27.87	27.87
BoAstV_CH13/NeuroS1_23985_KX266905	42.52	41.59	11.57	11.57	51.57	51.61	51.56	45.05	91.76	98.18	98.45	98.51		98.64	98.71	98.97	93.74	94.32	61.09	61.11	61.48	61.19	61.18	48.57	51.99	52.58	52.51	52.62	49.55	64.81	64.95	50.15	65.03	65.08	64.95	64.82	28.38	28.45	51.04	27.71	27.71
BoAstV_CH13/NeuroS1_26875_KX266903	42.54	41.53	11.63	11.63	51.57	51.63	51.6	45.02	91.65	98.28	98.59	98.62	98.64		98.79	99.08	93.71	94.29	61.15	61.17	61.32	61.17	61.06	48.24	51.84	52.39	52.35	52.47	49.61	64.95	65.08	50.25	65.17	65.22	65.08	64.96	28.38	28.45	51.09	27.66	27.66
BoAstV_CH13/NeuroS1_36716_KX266904	42.51	41.54	11.7	11.7	51.45	51.51	51.48	44.97	91.79	98.45	98.82	98.85	98.71	98.79		99.1	93.74	94.3	61.31	61.34	61.5	61.17	61.1	48.24	51.93	52.52	52.46	52.58	49.39	64.42	64.54	49.85	64.64	64.67	64.54	64.4	28.16	28.23	50.95	27.49	27.49
BoAstV_CH13/NeuroS1_23871_KX266901	42.49	41.54	11.63	11.63	51.5	51.54	51.51	45	91.82	98.53	98.93	98.93	98.97	99.08	99.1		93.84	94.4	61.25	61.28	61.51	61.28	61.21	48.45	52	52.56	52.53	52.62	49.51	64.81	64.95	50.15	65.03	65.08	64.95	64.82	28.38	28.45	51.06	27.71	27.71
BoAstV_CH13/NeuroS1_42799_KX266906	42.32	41.44	11.76	11.76	51.47	51.48	51.47	45	90.9	93.57	93.68	93.78	93.74	93.71	93.74	93.84		97.81	60.83	60.85	61.15	61.17	61.15	48.33	51.91	52.39	52.4	52.49	49.22	64.02	64.13	49.35	64.11	64.27	64.13	63.85	28	28.07	50.78	27.39	27.39
BoAstV_CH13/NeuroS1_26730_KX266902	42.3	41.45	11.79	11.79	51.41	51.42	51.44	44.92	91.19	94.06	94.1	94.26	94.32	94.29	94.3	94.4	97.81		61.03	61.05	61.24	61.31	61.29	48.53	51.98	52.31	52.33	52.42	49.51	64.29	64.4	49.55	64.37	64.54	64.4	64.13	28.11	28.23	50.9	27.49	27.49
Mamastrovirus_13_(OvAstV)_UK/2014/lamb_LT706530	41.4	41.12	11.64	11.64	50.18	50.19	50.07	43.64	61.3	61.04	61.16	61.27	61.09	61.15	61.31	61.25	60.83	61.03		99.89	91.72	90.65	90.62	49.44	51.54	51.77	51.86	51.88	48.56	63.82	64.06	49.04	63.9	64.2	63.92	63.64	27.75	27.82	50.42	28.13	28.13
Mamastrovirus_13_(OvAstV)_UK/2013/ewe_LT706531	41.41	41.15	11.64	11.64	50.19	50.2	50.09	43.7	61.27	61.07	61.19	61.29	61.11	61.17	61.34	61.28	60.85	61.05	99.89		91.64	90.72	90.72	49.49	51.6	51.82	51.92	51.94	48.54	63.95	64.2	49.14	64.04	64.33	64.06	63.78	27.8	27.87	50.43	28.18	28.18
BoAstV_BH89/14_LN879482	41.32	40.76	11.51	11.51	50.45	50.49	50.4	44.07	61.22	61.29	61.27	61.35	61.48	61.32	61.5	61.51	61.15	61.24	91.72	91.64		92.92	92.88	49.36	51.37	51.75	51.89	51.9	48.64	65.15	65.43	50.05	65.24	65.57	65.29	65.17	28.37	28.44	51.02	28.21	28.21
Mamastrovirus_13_(OvAstV)_strain_CH16_KY859988	41.4	40.93	11.26	11.26	50.43	50.48	50.37	44.3	61.16	61.11	61.19	61.22	61.19	61.17	61.17	61.28	61.17	61.31	90.65	90.72	92.92		98.94	49.53	51.54	51.75	51.99	52.09	48.36	65.02	65.29	49.95	65.11	65.43	65.16	64.9	28.32	28.44	50.85	28.48	28.48
BoAstV_CH15_KT956903	41.39	40.91	11.29	11.29	50.46	50.52	50.4	44.35	61.21	61.06	61.13	61.13	61.18	61.06	61.1	61.21	61.15	61.29	90.62	90.72	92.88	98.94		49.53	51.56	51.83	52.06	52.14	48.25	65.02	65.29	49.95	65.11	65.43	65.16	64.9	28.32	28.44	50.95	28.48	28.48
HAstV_SG__GQ891990	37.02	34.97	40.08	40.08	43.94	43.9	43.9	43.98	47.76	48.45	48.33	48.41	48.57	48.24	48.24	48.45	48.33	48.53	49.44	49.49	49.36	49.53	49.53		91.22	94.01	93.76	93.98	44.72	66.4	66.44	51.48	66.49	66.57	66.44	66.34	54.47	54.48	43.68	55.72	55.72
HAstV_PA_Paris_KM401565	41.89	41.25	11.11	11.11	49.46	49.43	49.43	42.05	51.38	51.82	52	51.94	51.99	51.84	51.93	52	51.91	51.98	51.54	51.6	51.37	51.54	51.56	91.22		94.63	94.66	94.77	49.16	67.07	66.99	51.99	67.16	67.13	66.99	66.9	29.55	29.48	49.32	29.55	29.55
HAstvV_UK1_KM358468	41.79	40.93	11.12	11.12	49.86	49.85	49.8	42.38	51.84	52.28	52.61	52.53	52.58	52.39	52.52	52.56	52.39	52.31	51.77	51.82	51.75	51.75	51.83	94.01	94.63		98.41	98.4	49.25	66.47	66.51	51.43	66.55	66.64	66.51	66.41	29.36	29.4	49.74	29.53	29.53
HAstV_VA1/HMOC_London2_KJ920197	41.58	41.1	11.39	11.39	50.09	50.05	50	42.53	51.97	52.28	52.57	52.5	52.51	52.35	52.46	52.53	52.4	52.33	51.86	51.92	51.89	51.99	52.06	93.76	94.66	98.41		99.38	49.58	66.53	66.57	51.58	66.62	66.71	66.57	66.48	29.38	29.32	49.84	29.61	29.61
HAstV_VA1/HMOC_London1_KJ920196	41.65	41.05	11.39	11.39	50.09	50.05	49.97	42.48	52.04	52.4	52.66	52.62	52.62	52.47	52.58	52.62	52.49	52.42	51.88	51.94	51.9	52.09	52.14	93.98	94.77	98.4	99.38		49.61	66.53	66.57	51.58	66.62	66.71	66.57	66.48	29.38	29.32	49.9	29.61	29.61
MiAstV_SMSAstV_GU985458	37.64	36.94	10.71	10.71	47.87	47.91	47.94	41.28	49.19	49.46	49.39	49.52	49.55	49.61	49.39	49.51	49.22	49.51	48.56	48.54	48.64	48.36	48.25	44.72	49.16	49.25	49.58	49.61		64.17	63.75	49.85	64.52	63.95	63.88	63.32	28.39	28.35	48	28.07	28.07
PoAstV3_USA/IA/02613C/2018_MH686395	47.58	46.54	50.95	50.95	84.58	84.05	83.38	84.05	64.29	64.55	64.15	65.08	64.81	64.95	64.42	64.81	64.02	64.29	63.82	63.95	65.15	65.02	65.02	66.4	67.07	66.47	66.53	66.53	64.17		100	99.6	99.6	99.79	99.59	99.72	98.9	98.89	93.03	92.8	92.8
PoAstV3_USA/IA/06535C/2018_MH686399	48.05	46.98	51.66	51.66	84.57	84.02	83.33	84.02	64.27	64.67	64.27	65.22	64.95	65.08	64.54	64.95	64.13	64.4	64.06	64.2	65.43	65.29	65.29	66.44	66.99	66.51	66.57	66.57	63.75	100		99.72	99.72	99.79	99.59	99.72	99.01	99.01	93.25	92.94	92.94
PoAstV3_USA/IA/02613A/2018_MH686394	35.23	34.69	50.95	50.95	65.51	65.1	64.59	65.1	49.55	49.95	49.55	50.35	50.15	50.25	49.85	50.15	49.35	49.55	49.04	49.14	50.05	49.95	49.95	51.48	51.99	51.43	51.58	51.58	49.85	99.6	99.72		99.73	99.79	99.59	99.72	98.9	98.89	71.95	92.8	92.8
PoAstV3_USA/IA/02613D/2018_MH686396	47.64	46.6	51.11	51.11	84.83	84.3	83.62	84.3	64.24	64.77	64.37	65.3	65.03	65.17	64.64	65.03	64.11	64.37	63.9	64.04	65.24	65.11	65.11	66.49	67.16	66.55	66.62	66.62	64.52	99.6	99.72	99.73		99.93	99.59	99.72	99.03	99.03	93.29	92.93	92.93
PoAstV3_USA/IA/06535D/2018_MH686400	48.05	46.98	51.66	51.66	84.64	84.09	83.4	84.09	64.4	64.81	64.4	65.35	65.08	65.22	64.67	65.08	64.27	64.54	64.2	64.33	65.57	65.43	65.43	66.57	67.13	66.64	66.71	66.71	63.95	99.79	99.79	99.79	99.93		99.66	99.79	99.08	99.08	93.32	93.01	93.01
PoAstV3_USA/IA/81706B/2017_MH686398	47.91	46.85	51.66	51.66	84.44	83.88	83.2	83.88	64.54	64.67	64.27	65.22	64.95	65.08	64.54	64.95	64.13	64.4	63.92	64.06	65.29	65.16	65.16	66.44	66.99	66.51	66.57	66.57	63.88	99.59	99.59	99.59	99.59	99.66		99.86	99.15	98.87	93.11	92.8	92.8
PoAstV3_USA/IA/81706C/2017_MH686397	48.01	46.79	51.66	51.66	84.41	83.85	83.15	83.85	64.13	64.54	64.13	65.1	64.82	64.96	64.4	64.82	63.85	64.13	63.64	63.78	65.17	64.9	64.9	66.34	66.9	66.41	66.48	66.48	63.32	99.72	99.72	99.72	99.72	99.79	99.86		99.3	99.01	93.12	92.94	92.94
PoAstV3_USA/IA/48545C/2015_MH686392	21.97	21.86	32.31	32.31	36.93	36.71	36.44	40.94	28.05	28.38	28.05	28.43	28.38	28.38	28.16	28.38	28	28.11	27.75	27.8	28.37	28.32	28.32	54.47	29.55	29.36	29.38	29.38	28.39	98.9	99.01	98.9	99.03	99.08	99.15	99.3		99.51	40.23	89.76	89.76
PoAstV3_USA/IA/48545D/2015_MH686391	21.92	21.7	32.31	32.31	36.87	36.65	36.38	40.87	28.07	28.45	28.12	28.5	28.45	28.45	28.23	28.45	28.07	28.23	27.82	27.87	28.44	28.44	28.44	54.48	29.48	29.4	29.32	29.32	28.35	98.89	99.01	98.89	99.03	99.08	98.87	99.01	99.51		40.22	89.76	89.76
PoAstV3_USA/IA/7023/2017_KY940545	39.64	39.29	11	11	85.22	85.08	85.02	73.59	50.45	51.07	51.07	51.22	51.04	51.09	50.95	51.06	50.78	50.9	50.42	50.43	51.02	50.85	50.95	43.68	49.32	49.74	49.84	49.9	48	93.03	93.25	71.95	93.29	93.32	93.11	93.12	40.23	40.22		42.66	42.66
PoAstV3_USA/IA/39697/2016_MH686393	22.16	21.6	32.74	32.74	36.83	36.61	36.34	40.82	27.52	27.82	27.39	27.87	27.71	27.66	27.49	27.71	27.39	27.49	28.13	28.18	28.21	28.48	28.48	55.72	29.55	29.53	29.61	29.61	28.07	92.8	92.94	92.8	92.93	93.01	92.8	92.94	89.76	89.76	42.66		99.75
PoAstV3_USA/IA/67348/2015_MH686390	22.16	21.6	32.74	32.74	36.83	36.61	36.34	40.82	27.52	27.82	27.39	27.87	27.71	27.66	27.49	27.71	27.39	27.49	28.13	28.18	28.21	28.48	28.48	55.72	29.55	29.53	29.61	29.61	28.07	92.8	92.94	92.8	92.93	93.01	92.8	92.94	89.76	89.76	42.66	99.75
Abbreviations: PoAstV, porcine astrovirus; MAstV, Mamastrovirus; BoAstV, bovine astrovirus; HuAstV, human astrovirus; MiAstV, Mink astrovirus; OvAstV, ovine astrovirus. Strains are identified with strain name and GenBank accesion (bold). Strains identified in this study are italicized.
